# Supplementary material
Source: PubMed Central journal article supplement (PMC7810136)
Supplement: NIHMS1653192-supplement-SF2.pdf [file NIHMS1653192-supplement-SF2.pdf]

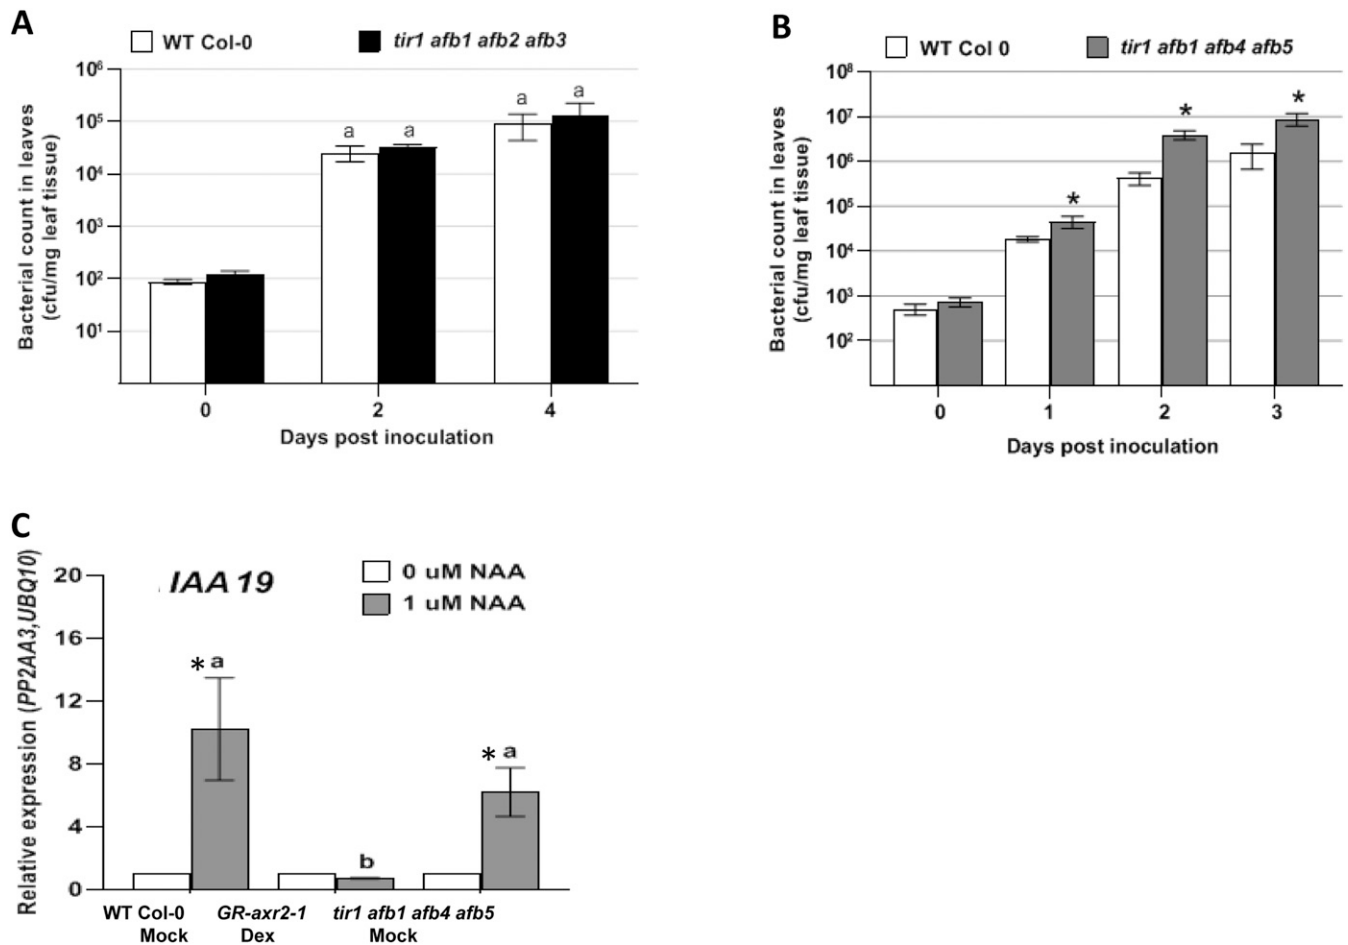

**Figure S2.** Growth of *PtoDC3000* and expression of auxin-responsive genes *IAA19* in auxin receptor mutants. **A**, Growth of *PtoDC3000* in the *tir1afb1afb2afb3* mutant. Similar results were observed in 3 additional independent experiments. **B**, Growth of *PtoDC3000* in WT Col-0 and *tir1afb1afb4afb5* plants. Values are an average  $\pm$  SEM for data from 4 biological replicates (leaves) for day 0 and 8 replicates for days 1, 2, and 3. Results were analyzed using ANOVA, followed by a Tukey's post test, and asterisks (\*) indicates significant differences between WT Col-0 and *tir1afb1afb4afb5* mutant plants with  $P < 0.05$  at each time point. Plants were inoculated with a bacterial suspension of  $10^6$  cfu ml<sup>-1</sup>. Samples from this experiment were used for gene expression experiments shown in Fig. 5. **C**, Expression of the auxin-responsive gene *IAA19* after NAA treatment. Values are an average  $\pm$  SEM for 3 biological replicates for Col-0 WT Mock, *GR-axr2-1* and *tir1afb1afb4afb5*. Samples indicated by different lower-case letters are significantly different ( $p < 0.05$ ). Similar results were obtained in a second independent experiment. \* indicates significant difference between treatment (0 and 1  $\mu$ M NAA) with  $p < 0.05$ . Results were analyzed using ANOVA, followed by a Tukey's post test. Samples indicated by different letters are significantly different at  $p < 0.05$ .
