# Supplementary material
Source: PubMed Central journal article supplement (PMC7810136)
Supplement: NIHMS1653192-supplement-SF3.pdf [file NIHMS1653192-supplement-SF3.pdf]

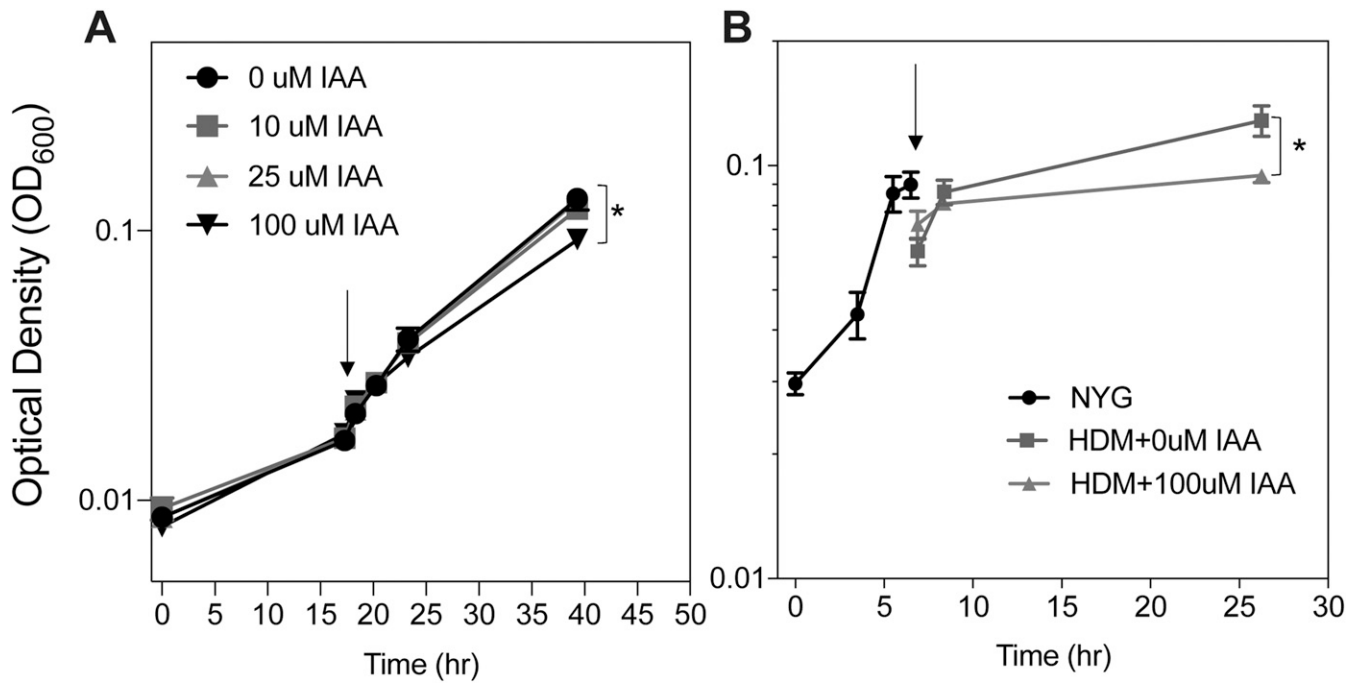

**Figure S3. Impact of IAA on growth of *PtoDC3000* in culture** **A**, Growth of *PtoDC3000* in Hrp De-repressing Medium (HDM) containing the indicated concentrations of IAA. IAA was added to the cultures at mid-log (arrow), and growth was monitored by quantifying cell density (OD<sub>600</sub>) over ~ 24 hours. **B**, *PtoDC3000* was grown in NYG to an OD of ~0.1, cells were collected via centrifugation, resuspended in NYG or HDM (arrow) containing the indicated concentrations of IAA and grown for ~24 hours. Growth was monitored by quantifying cell density (OD<sub>600</sub>). Cells were collected at 1.5 hours after transfer to HDM for RNA isolation. Cell cultures were grown in triplicate for both experiments. Data points are the average of 3 biological replicates per treatment and error bars represent SEM a student's t-test was performed to compare the effect of the IAA treatments on bacterial growth to Mock treatment with DMSO. \* p<0.05 . The data shown in panel **B** are from cultures used to monitor the effect of IAA on *PtoDC3000* gene expression shown in Fig. 4.
