# Supplementary material
Source: PubMed Central journal article supplement (PMC7810136)
Supplement: NIHMS1653192-supplement-SM1.pdf [file NIHMS1653192-supplement-SM1.pdf]

## SUPPORTING INFORMATION

### Plant Hormone Quantification: IAA and SA Extraction and Quantification

Materials. Indole-3-acetic acid (IAA) and salicylic acid (SA) were purchased from Sigma-Aldrich (St. Louis, MO) and Acros Organics (Geel, Belgium), respectively. Isotope-labeled internal standards  $d_4$ -salicylic acid ( $d_4$ -SA) and indole-2,4,5,6,7- $d_5$ -3-acetic acid ( $d_5$ -IAA) were sourced from CDN Isotopes (Pointe-Claire, Quebec). Methanol and acetonitrile (HPLC-grade) were sourced from J.T. Baker (Avantor Performance Materials) and LC-MS grade water was purchased from Honeywell Research Chemicals. Individual stock solutions of unlabeled and labeled compounds were prepared in 50% methanol and stored at  $-80\text{ }^{\circ}\text{C}$ . Standard solutions were prepared fresh in 30% methanol in the linear concentration ranges of 32 pM to 10  $\mu\text{M}$ . An internal standard solution was prepared in 30% methanol containing 2.5  $\mu\text{M}$   $d_5$ -IAA and  $d_4$ -SA.

Plant Hormone Extraction. Frozen plant material was extracted with 900  $\mu\text{L}$  of extraction solvent (ice-cold acetonitrile/methanol; 1:1 v:v) while samples were kept cold on ice. Ten (10) microliters of the internal standard mixture and two stainless steel 5 mm beads were added to each sample tube followed by brief mixing by vortexing. Samples were placed in pre-cooled ( $-80\text{ }^{\circ}\text{C}$ ) Tissue Lyser II racks and homogenized for 2 min at 15 Hz. Samples were centrifuged at full speed for 5 min at  $4\text{ }^{\circ}\text{C}$ , then the supernatant was transferred to a new 2 mL tube. Samples were re-extracted with another 900  $\mu\text{L}$  of extraction solvent, and then homogenized again for 2 min at 15 Hz. The samples were then centrifuged and supernatant transferred as previously described. The extraction solvent was removed under reduced pressure with a speed-vac until completely dry. Samples were reconstituted in 30 % MeOH (200  $\mu\text{L}$ ) and mixed thoroughly for 30 min at  $4\text{ }^{\circ}\text{C}$ . Finally, samples were filtered through 0.8  $\mu\text{m}$  PES spin-filters and 40  $\mu\text{L}$  of clarified supernatant was transferred to a 96-well microplate. Two (2)  $\mu\text{L}$  of sample was injected onto the column.

LC-MS/MS Instrumentation. Clarified samples were analyzed on an Eksigent ekspert™ microLC 200 coupled to a Sciex 6500 QTrap® (Framingham, MA) operated with polarity-switching electrospray ionization. The LC separation was achieved using a Waters (Milford, MA) Acquity UPLC® BEH C18 1.0 × 100 mm, 1.7 μm column kept at 50 °C with a flow rate of 15 μL/min while the autosampler was set at 8 °C. The mobile phases were 0.1 % acetic acid and 3:1 acetonitrile:methanol containing 0.1 % acetic acid running a gradient of 20 % B for 4 minutes ramping to 70 % B at 7 minutes, increasing to 95 % B at 7.5 minutes, holding for 5.5 minutes, then re-equilibrate at initial conditions at 13.5 minutes for 10 minutes (total runtime is 23.5 minutes). Data analysis was completed using MultiQuant 3.0.2 (AB Sciex) by normalizing the peak areas of the unlabeled analytes relative to the peak areas of the labeled internal standards. Calibration curves were linear ( $r$  values = > 0.99) within the ranges provided above applying a 1/x weighting scheme.

Compound-dependent parameters

| Compound            | MRM Transition | Retention time (min) | DP (V) | EP (V) | CE (V) | CXP (V) |
|---------------------|----------------|----------------------|--------|--------|--------|---------|
| IAA                 | 176.0 → 130.0  | 10.24                | 23     | 7      | 40     | 19      |
| d <sub>5</sub> -IAA | 181.0 → 134.0  | 10.22                | 23     | 7      | 25     | 19      |

|                    |              |       |     |     |     |     |
|--------------------|--------------|-------|-----|-----|-----|-----|
| SA                 | 137.0 → 93.0 | 10.20 | -22 | -13 | -20 | -10 |
| d <sub>4</sub> -SA | 141.0 → 97.0 | 10.18 | -41 | -9  | -23 | -11 |

Source settings

Ionspray voltage: polarity switching between -4500 V in -ve to 4500 V in +ve

Curtain gas: 15

Gas 1: 35

Gas 2: 35

**SUPPLEMENTARY TABLE**

**Supplementary Table S1. Primers used in this study**

| Gene                                | Forward primer (5'-3')      | Reverse primer (5'-3')       | Reference for primers    |
|-------------------------------------|-----------------------------|------------------------------|--------------------------|
| <b>RT-qPCR</b>                      |                             |                              |                          |
| <i>GH3.3</i><br><i>AT2G23170</i>    | TGTGTGAGTTTCACGCCAAT        | CAAAGGAGGGACAGAGTGGA         | (Mutka 2013)             |
| <i>IAA19</i><br><i>AT3G15540</i>    | GAGATGTGGCAGAGAAGATG        | TTCCTCAAATAAGGCACACC         | (Mutka 2013)             |
| <i>PR1</i><br><i>AT2G14610</i>      | GGAGCTACGCAGAACAATAAGA      | CCCACGAGGATCATAGTTGCAACTGA   | (Mutka 2013)             |
| <i>PP2AA3</i><br><i>AT1G13320</i>   | AACGTGGCCAAAATGATG          | AACCGCTTGGTCGACTATCG         | (Czechowski et al. 2005) |
| <i>UBQ10</i><br><i>At4g05320</i>    | CGTTAAGACGTTGACTGGGAAAAC    | GCTTTCACGTTATCAATGGTGTCA     | (Czechowski et al. 2005) |
| <i>avrPto</i><br><i>PSPTO_4001</i>  | ATGACGGGAGCGTCAGGAATCAAT    | ATCCGTTCCGGTTCATAGTCGCAA     | (Anderson et al. 2014)   |
| <i>HrpL</i><br><i>PSPTO_1404</i>    | TCAGGAAAGCTGGGAAGAC-GAAGT   | ATGTTTCGACGGCAGGCAATCAATG    | (Anderson et al. 2014)   |
| <i>mqp</i><br><i>PSPTO_1136</i>     | GCGGCTGATGGCTCCATCGAC       | CGGGACCGGATTGATGAACGAC       | This work                |
| <i>cmaA</i><br><i>PSPTO_4709</i>    | CCGTGATGTTTACCTCTGGCAC      | GGACGAGTGATGTACGTAGCTGC      | This work                |
| <i>hcp1</i><br><i>PSPTO_2539</i>    | GGTCGACGCAGGCATAACGC        | CTCCTTGCCGTCGTTAGTGCG        | This work                |
| <i>tvrR</i><br><i>PSPTO_3576</i>    | GGCTCGCAACGGCCCATCTG        | CATGCGGTAGACGGCCAGCG         | This work                |
| <i>PSPTO_5415</i>                   | <b>GCCAGGAAGGGCATGTGCTG</b> | <b>AATCCCTTGATGACCGGCACG</b> | <b>This work</b>         |
| <i>16S rRNA</i><br><i>PSPTO_r01</i> | TAATGGCTCACCAAGGCGACG       | TGGCTGGATCAGGCTTTCGC         | This work                |
| <i>rpoD</i><br><i>PSPTO_0537</i>    | GAAGTTGACGAAAGCTGGACCG      | CGACGGTTGATGTCCTTGATCTC      | This work                |

|                   |                       |                           |                    |
|-------------------|-----------------------|---------------------------|--------------------|
| <i>gyrB</i>       | CTTCAGCTGGGACATTCTGGC | AACCGCCTTCGTACTIONTGAACAG | This work          |
| <i>PSPTO_0004</i> |                       |                           |                    |
| <i>recA</i>       | TAGAACTTCAGCGCGTTACC  | GCCAACTGCCTGGTTATCT       | (Smith et al.2018) |
| <i>PSPTO_4033</i> |                       |                           |                    |

### Genotyping (PCR) and Cloning

|                      |                                                  |                                                     |              |
|----------------------|--------------------------------------------------|-----------------------------------------------------|--------------|
| <i>sid2-2 sm108F</i> | TTCTTCATGCAGGGGAGGAG                             | AAGCAAATGTTTGAGTCAGCA                               | (Mutka 2013) |
| <i>WT- Sm30F</i>     | CAACCACCTGGTGCACCAGC                             |                                                     |              |
| <i>GR-axr2-1</i>     | GR: GCCATCGTCAAAGGGGAAGG                         |                                                     | This work    |
| <i>axr2</i>          |                                                  | TGACTCTAACTCGGTAAGGTTTCAT                           | This work    |
| <i>TopoGW_GR__F1</i> | CACCATGATTCAGCAAGCCACTGC                         |                                                     | This work    |
| <i>GR_AXR2_R1</i>    |                                                  | TGAGGTTTCATAAGTTGGCCGAT<br>CATTNTTTTGATGAAACAGAAGCT | This work    |
| <i>GR_AXR2_F1</i>    | AGCTTCTGTTTCATCAAAAATG<br>ATCGGCCAACTTATGAACCTCA |                                                     | This work    |
| <i>AXR2_V1_R1</i>    |                                                  | TCAAGATCTGTTCTTGCAGTACT                             | This work    |

|
